# Supplementary material for: 2020 Imaging Guidelines for Thyroid Nodules and Differentiated Thyroid Cancer: Korean Society of Thyroid Radiology
Source: PubMed Central journal article supplement — Korean J Radiol. 2021 Feb 9;22(5):840–60. doi: 10.3348/kjr.2020.0578 (PMC8076832; doi:10.3348/kjr.2020.0578), 2021-02-09
Supplement: kjr-22-840-s001.pdf [file kjr-22-840-s001.pdf]

## Supplementary Materials

**Supplementary table 1.** Relative radiation levels in Korean clinical imaging

| Symbol                                                                              | RRL       | Example                                                                                                                                                                                                       |
|-------------------------------------------------------------------------------------|-----------|---------------------------------------------------------------------------------------------------------------------------------------------------------------------------------------------------------------|
| 0                                                                                   | 0         | Ultrasonography, MRI                                                                                                                                                                                          |
|    | < 1 mSv   | Plain radiography                                                                                                                                                                                             |
|    | 1-5 mSv   | Low dose chest CT, brain CT, contrast enhanced neck CT (Neck CT without IV contrast, neck CT with IV contrast, neck CT with and without IV contrast), chest CT without IV contrast, chest CT with IV contrast |
|  | >5-10 mSv | Chest CT with and without IV contrast, abdominal CT                                                                                                                                                           |
|  | >10mSv    | 3 phase dynamic CT                                                                                                                                                                                            |
